# Supplementary material for: Is Regular Radiographic Upper Urinary Tract Imaging for Surveillance of Non-Muscle Invasive Bladder Cancer Justified?
Source: MDPI journal article supplement (doi:10.3390/cancers14225586), 2022-11-14
Supplement: s1 [file s1]

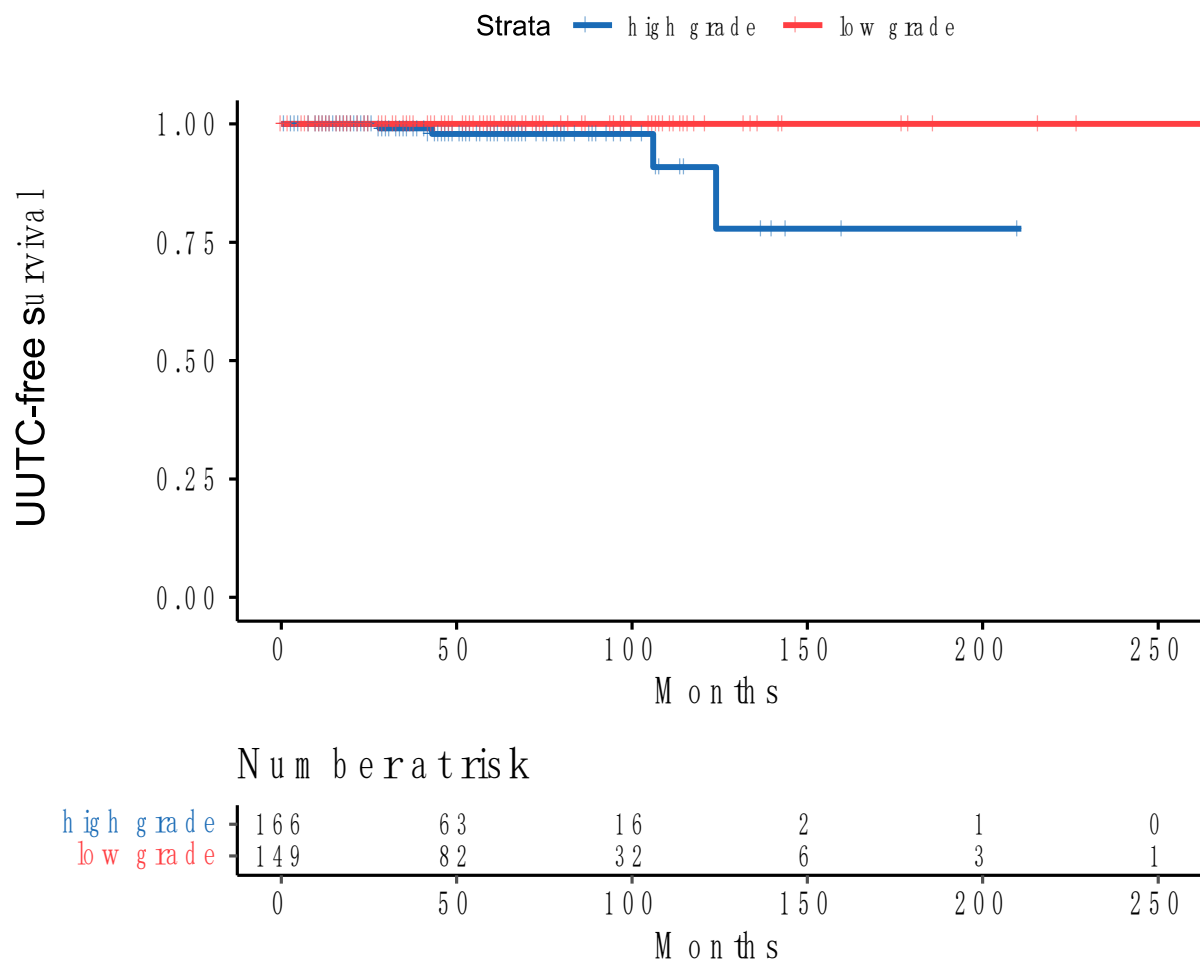

**Supplemental Figure S1.** Kaplan-Meier curve for UTUC free survival categorised by grade (HG and LG). The red and blue band bordering the curve marks the 95% confidence interval; censored subjects are indicated as tick marks.
